# Supplementary material
Source: Research Square preprint supplement (doi:10.21203/rs.3.rs-9288120/v1)
Supplement: Supplementary file 1 [file 371a7985dc57560139e13519.xlsx]

## Sheet: Table_5
	Table.5 Phenotypic Labels and Core Distinguishing Features
	Cluster	Phenotypic Label	Core Distinguishing Characteristics
	1	Intermediate Social-Communication Deficit	Moderate deficits across sensory, relating, and language domains; minimal body/object use impairment (2.18); intermediate overall severity
	2	Severe Multidimensional Impairment	Highest scores across sensory (14.53), relating (14.28), and body/object use (11.31); severe generalized phenotype with concurrent disruptions in sensory integration, social reciprocity, and repetitive behaviors
	3	Mild-to-Moderate Generalized Impairment	Balanced moderate elevations across all five domains; relatively uniform impairment profile without extreme peaks in any single dimension
	4	Moderate Social-Relational & Language-Impaired	Elevated relating (13.45) and language (15.31) with moderate sensory dysfunction; preserved body/object use (3.84); highest CARS overall severity (33.25)
	5	Minimally Impaired/High-Functioning	Lowest scores across all domains; attenuated sensory (4.51) and social (5.81) impairment; largest subgroup (n=490); suggests compensated/masked presentation
	6	Language-Dominant Impairment	Highest language impairment (17.22) with relatively preserved sensory (7.50); severe communicative deficits disproportionate to sensory processing capacity; elevated social/self-help difficulties (13.03)
