# Supplementary material
Source: Research Square preprint supplement (doi:10.21203/rs.3.rs-9288120/v1)
Supplement: Supplementary file 2 [file 4d41a67400446c817e4218cf.xlsx]

## Sheet: table_4
	variables	ANOVA						post-hoc
		cluster	sample	mean	s.d.	F	sig
	cars	4	220	33.25	3.43	3.46	0	4>1,3,6
		2	339	32.26	6.37
		5	490	32.09	5.53
		1	308	31.83	4.8
		3	339	31.68	4.48
		6	187	31.51	4.24
	sensory	2	339	14.53	4.03	377.46	0	2>4>1,6,3>5
		4	220	9.59	3.39
		1	308	7.97	3.71
		6	187	7.5	3.02
		3	339	7.43	3.39
		5	490	4.51	2.51
	relating	2	339	14.28	3.13	304.45	0	2,4>1,3,6>5
		4	220	13.45	3.01
		6	187	9.4	3.52
		1	308	9.3	4.25
		3	339	8.83	3.07
		5	490	6.06	3.08
	body_object_use	2	339	11.31	4.24	329.55	0	2>6,3>4>1,5
		6	187	5.4	4.19
		3	339	4.86	4.36
		4	220	3.84	3.49
		1	308	2.18	3.1
		5	490	1.48	2.8
	language	6	187	17.22	3.83	309.02	0	6>4>1>3>5
		4	220	15.31	4.02
		2	339	14.67	2.83
		1	308	13.76	4.37			6>2,1>3>5
		3	339	8.96	5.18
		5	490	6.62	4.55
	social	6	187	13.03	4.16	186.94	0	6>2,3>1,4>5
		2	339	11.37	3.47
		3	339	11.24	3.04
		1	308	9.88	3.62
		4	220	9.13	3.43
		5	490	5.81	3.4
