# Supplementary material
Source: Research Square preprint supplement (doi:10.21203/rs.3.rs-9288120/v1)
Supplement: Supplementary file 3 [file 6a12e221ceeb7a3c905d73a9.xlsx]

## Sheet: table_1
	Metric		Definition		Interpretation and Application
	Accuracy		Proportion of correctly classified instances among total cases		Intuitive overall performance measure, but misleading in imbalanced datasets.
	Precision	Positive Predictive Value)	Reliability of positive predictions		Critical when false positives carry substantial costs, ensures identified positives are genuine.
	Recall	Sensitivity / True Positive Rate	Ability to correctly identify all actual positive instances		Essential in screening applications where missing positives (FN) has severe consequences.
	F1-Score		Harmonic mean of precision and recall		Balanced assessment valuable for imbalanced data or when FP and FN warrant equal consideration.
	Specificity	True Negative Rate	Capacity to correctly identify negative instances		Paramount when minimizing false positive classifications is essential.
	AUROC	Area Under the ROC Curve	Probability that model ranks random positive higher than random negative		Threshold-independent discriminative ability, robust for comprehensive assessment.
	Table.1 Model performance metrics used to evaluate and select XGBoost Classifiers
