# Supplementary material
Source: Research Square preprint supplement (doi:10.21203/rs.3.rs-9288120/v1)
Supplement: Supplementary file 4 [file 80dae95c86c1f099da70ef5e.xlsx]

## Sheet: table_2
	Variables		Mean(SD)/Count (%)
	Sample		1883
	Gender
	Girls		283(15)
	Boys		1600(85)
	Age (months)
	Overall		64.47±20.04
	0-35/nursery		103(5.5)
	36-71/kindergarten		1128(59.9)
	72-143/primary		592(31.4)
	144-180/junior high		6(0.3)
	ABC outcome
	Total		43.79±16.85
	Sensory behavior		8.22(4.67)
	Relating Behavior		9.76(4.48)
	Body and Obejct Use Behavior		4.61(4.99)
	Language Behavior		11.69(5.76)
	Social Behavior		9.52(4.25)
	ABC evaluation criteria
	0-46/non-autism		1016(54.0)
	47-53/suspected		328(17.4)
	31-67/highly suspected		385(20.4)
	＞67/confirmed		154(8.2)
	Cars outcome
	Total		31.73(4.56)
	Cars evaluation criteria
	0-29/normal		599(31.8)
	30-36/moderate		976(51.8)
	37-/severe		308(16.4)
	Abbreviation:S.D.,standard deviation,ABC,Autism Behavior Checklist.
	Table.1 Participant demographic data

## Sheet: Sheet1
	描述统计
		个案数	平均值	标准差
	age	1883	64.4663	20.0442	64.47	20.04	64.47(20.04)
	abc	1883	43.7913	16.8457	43.79	16.85	43.79(16.85)
	abc_s	1883	8.21986	4.66776	8.22	4.67	8.22(4.67)
	abc_r	1883	9.76049	4.47991	9.76	4.48	9.76(4.48)
	abc_b	1883	4.60807	4.98546	4.61	4.99	4.61(4.99)
	abc_l	1883	11.6909	5.7575	11.69	5.76	11.69(5.76)
	abc_s	1883	9.5162	4.25354	9.52	4.25	9.52(4.25)
	cars	1883	31.7329	4.56402	31.73	4.56	31.73(4.56)
	有效个案数（成列）	1883			0	0
