# Supplementary material
Source: Research Square preprint supplement (doi:10.21203/rs.3.rs-9288120/v1)
Supplement: Supplementary file 5 [file b3394d1fefcf5c13d3c239b9.xlsx]

## Sheet: table_3
		accuracy_score	precision_score	recall_score	f1_score/sensitivity	specificty	AUROC
	l45	0.90177	0.752066	0.52907	0.62116	0.968685	0.875398
	r45	0.89469	0.692308	0.666667	0.679245	0.940489	0.910986
	l65	0.918584	0.811475	0.589286	0.682759	0.976091	0.902497
	r65	0.917699	0.77931	0.649425	0.708464	0.966527	0.920797
	l85	0.89823	0.744966	0.590426	0.658754	0.95966	0.911805
	r85	0.907965	0.694268	0.660606	0.677019	0.950259	0.936992
	Table.3 Xgboost model perfomance metrics using data collected from different testing conditions
